# Supplementary material for: Maltese as a Foreign Language Educator’s Acquisition of Intercultural Capabilities
Source: Research Square preprint supplement (doi:10.21203/rs.3.rs-268642/v1), 2021-03-01
Supplement: Supplementary file 1 [file 76fc8fcdef99627d5161b797.docx]

**APPENDIX**

**The MFL Learners of the 17 Teachers**

| **Teacher** | **Learner’s Nationality** | **Gender (M/F)** | **Age** | **First Language (L1)** | **Marital Status** | **Job** | **Reasons for Learning MFL** |
| --- | --- | --- | --- | --- | --- | --- | --- |
| **Teacher 1** | Indian | F | 35 | Hindi | single | nurse | “to understand my patients” |
| Serb | F | 37 | Serbian | single | maid | “to understand my clients” |
| Syrian | M | 38 | Levantine Arabic | married | builder | “to understand my colleagues’ jokes” |
| Venezuelan | M | 32 | Spanish | divorced | receptionist | “to find a better job” |
| **Teacher 2** | Bulgarian | M | 38 | Bulgarian | in a relationship | chef | “to understand better the Maltese people” |
| Filipino | M | 23 | Tagalog | single | care worker | “to feel a sense of belonging in Malta” |
| Italian | M | 42 | Italian | married | barista | “to communicate better with the Maltese” |
| Libyan | F | 32 | Libyan Arabic | married | manageress | “to help my children with their homework” |
| Serb | M | 31 | Serbian | single | builder | “to talk and joke with my Maltese colleagues who hardly know a word in English” |
| Serb | M | 38 | Serbian | in a relationship | doctor | “to understand my patients, especially the elderly” |
| Serb | M | 57 | Serbian | married | house painter | “to understand my Maltese wife” |
| Serb | M | 49 | Serbian | married | surgeon | “to understand my patients” |
| Somali | M | 47 | Somali | divorced | cleaner | “to get more clients” |
| **Teacher 3** | Indian | F | 27 | Hindi | married | nurse | “to help my children with their learning of Maltese and to understand better the Maltese society, its culture and the way the Maltese think and behave” |
| Libyan | M | 39 | Libyan Arabic | married | hotel manager | “to integrate better” |
| Moroccan | M | 23 | Moroccan Arabic | in a relationship | student | “out of respect for the host country, Malta and the Maltese” |
| Russian | M | 45 | Russian | married | doctor | “I definitely need it for work” |
| Russian | M | 46 | Russian | divorced | surgeon | “to hopefully be understood by my patients and their relatives” |
| Serb | F | 32 | Serbian | separated | receptionist | “to make new friends” |
| Serb | M | 27 | Serbian | in a relationship | salesman | “to understand what the customers want” |
| Ukrainian | M | 31 | Ukrainian | in a relationship | waiter | “to joke more with my colleagues” |
| **Teacher 4** | Italian | M | 20 | Italian | single | chef | “to integrate better in the village where I wish to keep on living” |
| Pakistani | M | 25 | Urdu | married | nurse | “to give a helping hand to the elderly” |
| Palestinian | M | 34 | Levantine Arabic | married | builder | “to find a more suitable job” |
| Serb | M | 31 | Serbian | in a relationship | clerk | “to hopefully understand my girlfriend’s parents” |
|  | Indian | F | 74 | Hindi | widow | housewife | “out of respect for living in Malta” |
|  | Libyan | M | 35 | Arabic | in a relationship | unemployed | “to find a job” |
| **Teacher 5** | Indian | M | 31 | Hindi | married | nurse | “to help whoever needs me” |
|  | Russian | M | 52 | Russian | divorced | surgeon | “to understand and be understood better by my patients” |
|  | Swedish | M | 26 | Swedish | single | affiliate manager | “to make new friends” |
|  | Ukrainian | M | 23 | Ukrainian | single | doctor | “to understand my patients better” |
| **Teacher 6** | Bulgarian | M | 31 | Bulgarian | in a relationship | waiter | “to make life easier” |
| Burkinabe | M | 36 | French | married | furniture assembler | “to understand my clients better” |
| Nigerian | M | 43 | English | married | house painter | “out of respect for Malta” |
| Syrian | M | 53 | Levantine Arabic | married | builder | “to understand my Maltese colleagues’ jokes” |
| Ukrainian | M | 31 | Ukrainian | in a relationship | customer advisor | “for better connections” |
| Venezuelan | F | 44 | Spanish | married | maid | “to be understood by my clients” |
| **Teacher 7** | Filipino | M | 27 | Tagalog | in a relationship | carer | “to understand the elderly” |
| Greek | M | 26 | Greek | single | student | “for further studies” |
| Palestinian | M | 35 | Levantine Arabic | married | carpenter | “to have more clients” |
| Russian | M | 34 | Russian | married | shop attendant | “to understand my clients” |
| Serb | M | 24 | Serbian | single | builder | “to improve integration” |
| **Teacher 8** | Cypriot | F | 26 | Cypriot Greek | in a relationship | student | “for further studies” |
| Danish | F | 47 | Danish | divorced | games presenter | “to help my children with their studies” |
| Ethiopian | F | 37 | Amharic | married | cleaner | “to help my kids with their homework” |
| German | F | 64 | German | married | payments analyst | “I love to learn languages” |
| Greek | M | 38 | Greek | married | cook | “to understand my colleagues” |
| Indian | M | 38 | Hindi | married | nurse | “to understand my patients and be understood by them” |
| Libyan | M | 45 | Libyan Arabic | married | sales manager | “to help me participate more in society” |
| Libyan | M | 46 | Libyan Arabic | married | auditor | “to integrate better in the Maltese society” |
| Pakistani | M | 48 | Urdu | married | bus driver | “to undertand better the complaints of the passengers” |
| Pakistani | F | 31 | Urdu | married | nurse | “to joke in Maltese with patients” |
| Palestinian | M | 39 | Levantine Arabic | married | paint sprayer | “to understand my Maltese colleagues better” |
| Serb | M | 41 | Serbian | married | plumber | “to have more clients” |
| Serb | F | 42 | Serbian | married | receptionist | “to integrate better in the Maltese community” |
| Serb | M | 31 | Serbian | single | bartender | “to achieve economic and social integration” |
| **Teacher 9** | Chinese | M | 41 | Chinese | married | chef | “to find my way around in Malta” |
| Chinese | F | 35 | Chinese | married | beauty therapist | “to have more clients” |
| English | F | 35 | English | separated | clerk | “to make new friends” |
| Filipino | M | 37 | Tagalog | married | elderly carer | “to understand better the elderly” |
| Filipino | F | 44 | Tagalog | in a relationship | hairdresser | “because foreign languages make you smarter!” |
| Filipino | F | 36 | Tagalog | married | house helper | “to keep my Maltese husband happy” |
| Japanese | F | 27 | Japanese | single | student | “I love learning new languages” |
| Korean | M | 21 | Korean | single | games presenter | “to survive in an entirely new culture” |
| Libyan | M | 46 | Libyan Arabic | married | supervisor | “knowing Maltese looks awesome on my CV!” |
| Pakistani | M | 32 | Urdu | married | bus driver | “to understand what the surrounding people are saying” |
| Pakistani | F | 29 | Urdu | married | nurse | “to understand the elderly patients” |
| Palestinian | M | 20 | Levantine Arabic | single | electrician | “to have more clients” |
| Serb | F | 29 | Serbian | in a relationship | clerk | “to learn useful phrases” |
| Somali | M | 40 | Somali | married | builder | “to joke with my colleagues” |
| Somali | M | 34 | Somali | married | material handler | “to talk and understand my Maltese colleagues” |
| **Teacher 10** | Chinese | M | 33 | Chinese | married | researcher | “to appreciate a new culture and cuisine” |
| Filipino | F | 28 | Tagalog | single | carer | “to help whoever needs me” |
| Filipino | F | 43 | Tagalog | married | housekeeper | “Maltese people appreciate you more when you talk in Maltese” |
| Filipino | F | 36 | Tagalog | married | nanny | “to talk in Maltese with my children and others” |
| Korean | M | 20 | Korean | single | student | “for the love of languages” |
| Libyan | M | 32 | Libyan Arabic | married | resort manager | “I am interested in Maltese grammar” |
| Pakistani | M | 45 | Urdu | married | bus driver | “to understand my colleagues” |
| Russian | F | 41 | Russian | married | receptionist | “to understand my neighbours, especially when they are yelling at each other” |
| Serb | M | 31 | Serbian | married | clerk | “to know my wife’s language” |
| Serb | M | 37 | Serbian | married | construction cleaner | “to understand what the other Maltese workmen are saying” |
| Somali | M | 37 | Somali | married | cleaner | “for work” |
| Somali | M | 26 | Somali | married | kitchen assistant | “to understand my colleagues better” |
| Somali | M | 37 | Somali | married | cleaner | “to understand Maltese manners” |
| Syrian | M | 35 | Mesopota--mian Arabic | married | tile layer | “to have actual conversations with my colleagues” |
| Swedish | M | 39 | Swedish | divorced | customer support agent | “to pick up diving” |
| **Teacher 11** | Burkinabe | M | 44 | French | married | dishwasher | “to continue to live in Malta” |
| Burkinabe | M | 39 | French | married | handy person | “to read and understand the street signs and other signs” |
| Burkinabe | M | 36 | French | married | builder | “to continue to live in Malta” |
| Chinese | M | 45 | Chinese | married | massage therapist | “to understand my Maltese clients better” |
| Cypriot | F | 25 | Cypriot Greek | single | analyst | “to enjoy the benefits of being bilingual” |
| Czech | F | 30 | Czech | single | waitress | “my boss told me that I should learn Maltese” |
| English | F | 21 | English | single | receptionist | “to find a better job” |
| Filipino | F | 39 | Tagalog | married | carer | “to understand the elderly patients” |
| Korean | M | 31 | Korean | in a relationship | student | “to make new friends” |
| Libyan | M | 46 | Libyan Arabic | married | general manager | “to do more business with the Maltese” |
| Serb | M | 43 | Serbian | separated | construction labourer | “to understand my colleagues’ jokes” |
| Serb | M | 37 | Serbian | married | truck driver | “to understand what the Maltese are saying when socializing among each other” |
| Somali | M | 38 | Somali | married | general labourer | “to find a better job” |
| Venezuelan | F | 22 | Spanish | in a relationship | dishwasher | “to understand what the other Maltese workers are saying amongst each other” |
| **Teacher 12** | Libyan | M | 36 | Libyan Arabic | married | sales manager | “to appreciate how my language influenced Maltese” |
| Russian | F | 41 | Russian | married | receptionist | “to understand my neighbours, especially when they are yelling at each other” |
| Serb | M | 37 | Serbian | married | construction cleaner | “to understand what the other Maltese workmen are saying” |
| **Teacher 13** | Burkinabe | M | 42 | French | married | maintenance operative | “to integrate better in Malta” |
| Burkinabe | M | 35 | French | married | kitchen assistant | “to live in Malta for good” |
| Burkinabe | M | 20 | French | married | site cleaner | “to understand my colleagues” |
| Chinese | M | 31 | Chinese | in a relationship | manager | “to show respect to the host country” |
| Cypriot | F | 21 | Cypriot Greek | single | student | “to make new friends” |
| Czech | F | 30 | Czech | single | waitress | “to understand the Maltese better” |
| Indian | F | 33 | Hindi | married | chef | “to understand the Maltese culture” |
| Indian | M | 31 | Hindi | married | iGaming infrastructure architect | “to make connections” |
| Russian | M | 40 | Russian | married | team leader | “I am interested in the Maltese language” |
| Somali | M | 32 | Somali | married | kitchen porter | “to understand Maltese anger and complaints” |
| **Teacher 14** | Czech | F | 36 | Czech | married | receptionist | “to communicate better with my husband” |
| English | F | 36 | English | single | marketing coordinator | “a better chance to get a promotion” |
| Spanish | F | 27 | Spanish | in a relationship | child carer | “to be able to communicate with Maltese children” |
| Vietnamese | F | 47 | Vietname-  -se | married | waitress | “to make new friends” |
| **Teacher 15** | Indian | M | 46 | Hindi | married | technical project manager | “to understand the Maltese way of thinking” |
| Indian | M | 37 | Hindi | married | delivery man | “to show my interest and commitment to Malta” |
| Indian | M | 41 | Hindi | married | nurse | “to get by better in Malta” |
| Italian | F | 32 | Italian | married | chef | “as my children are learning it too” |
| Libyan | M | 34 | Libyan Arabic | married | marketing manager | “to enjoy secret codes with my wife when going abroad” |
| Somali | M | 42 | Somali | married | waste collection operator | “to hopefully find my dream job” |
| **Teacher 16** | Filipino | M | 24 | Tagalog | single | care worker | “to express things difficult to express in my native language” |
| Indian | M | 41 | Hindi | married | shop assistant | “to make me a more articulate person” |
| Russian | F | 35 | Russian | divorced | account executive | “to understand what my Maltese colleagues are saying” |
| **Teacher 17** | Chinese | M | 40 | Chinese | married | cook | “I am required to learn Maltese” |
| Czech | F | 33 | Czech | single | content writer | “I enjoy the challenge of learning a new language” |
| Filipino | M | 48 | Tagalog | married | store keeper | “I like the sound of Maltese when it is spoken” |
| Indian | M | 31 | Hindi | married | nurse | “I’m a linguaholic and enjoy learning them” |
| Indian | M | 44 | Hindi | married | kitchen helper | “to help people in need” |
| Libyan | M | 38 | Libyan Arabic | married | manager | “to understand my language and culture better” |
| Pakistani | M | 33 | Urdu | married | nurse | “to keep my mind healthy” |
| Pakistani | M | 43 | Urdu | married | restaurant manager | “to help me understand how Maltese people think” |
| Russian | M | 25 | Russian | single | receptionist | “to show respect to the country that is hosting me” |
| Swedish | F | 26 | Swedish | single | head of iGaming operations | “to understand the Maltese and be understood” |
| Syrian | M | 34 | Levantine Arabic | married | plumber | “to find a new job” |
| Ukrainian | M | 32 | Ukrainian | single | customer advisor | “I am interested in the linguistic aspects of Maltese” |
| Ukrainian | M | 33 | Ukrainian | single | online casino presenter | “to make new friends” |
|  | Swedish | F | 26 | Swedish | single | head of iGaming operations | “to understand the Maltese and be understood” |
|  | Venezuelan | F | 35 | Spanish | in a relationship | customer verification officer | “to make new friends” |
|  | Vietnamese | F | 31 | Vietname-  -se | married | maid | “to find a better job” |
|  | Vietnamese | F | 27 | Vietname-  -se | married | nail technician | “to understand better what my clients want” |
|  | Venezuelan | F | 34 | Spanish | single | child carer | “to find my future Maltese husband!” |
|  | Vietnamese | F | 33 | Vietname-  -se | married | cleaner | “to get a promotion” |
|  | Venezuelan | F | 47 | Spanish | married | child carer | “to help the children with their Maltese” |
